# Supplementary material for: Minimal in vitro systems shed light on cell polarity
Source: Oxford University Press journal article supplement (doi:10.1242/jcs.217554), 2019-01-30
Supplement: jcs217554supp.pdf [file jcs217554supp.pdf]

**Table S1. Development of geometrical confinements *in vitro*.**

| Confinement                                 | Method                                                                                                                                                                                                                                                                                                         | Achieved sizes and shapes                                                                                                                                                              | References                                                 |
|---------------------------------------------|----------------------------------------------------------------------------------------------------------------------------------------------------------------------------------------------------------------------------------------------------------------------------------------------------------------|----------------------------------------------------------------------------------------------------------------------------------------------------------------------------------------|------------------------------------------------------------|
| 2D free standing SLBs (open confinement)    | Flat supported lipid bilayers (SLBs) were formed on a silica slide and glass cover slip to mimic the cell membrane.                                                                                                                                                                                            | Large patches of no specific size and orders of magnitude larger than the specific length scale of the Min pattern.                                                                    | Loose et al., 2008                                         |
| 2D rectangular flowcell setup               | Flat supported lipid bilayers were formed in a fused silica surface of a 25 $\mu\text{m}$ deep flow cell. Flow cells consist of two silica slides that are fused together and contain a (usually) rectangular flow channel in between, which has an inlet or outlet hole on each side to apply liquid samples. | Rectangular flow cell: 4 mm x 30 mm                                                                                                                                                    | Ivanov and Mizuuchi, 2010; Vecchiarelli et al., 2014, 2016 |
| 2D confinements of various shapes and sizes | Supported lipid bilayers of various shapes and sizes, or with obstacles placed inside of them, were produced by photolithography. Hereby 2D gold microstructures were used as confinement borders and obstacles.                                                                                               | Rectangular shapes: 6-100 $\mu\text{m}$ $\times$ 100-800 $\mu\text{m}$ L-, ring, and wave-shaped confinements: approx. 30-50 $\mu\text{m}$ wide and several hundred $\mu\text{m}$ long | Schweizer et al., 2012                                     |
| Semi-3D confinement                         | Supported lipid bilayers were produced on PDMS microcavities of 10 $\mu\text{m}$ depth. The Min proteins were introduced via a buffer reservoir that was placed on top of the grooves. The buffer level was subsequently lowered below the upper rim of the microcavities.                                     | Rectangular confinements: 10 $\mu\text{m}$ x 12-245 $\mu\text{m}$                                                                                                                      | Zieske and Schwille, 2013, 2014                            |
| 3D droplets                                 | Microdroplets, made out of lipid monolayers, were used to mimic 3D cellular compartments. The droplets were pipetted on a glass cover slip.                                                                                                                                                                    | Droplets with a diameter of approx. 10-70 $\mu\text{m}$ .                                                                                                                              | Zieske et al., 2016                                        |
| 3D fully confined microfluidic chambers     | Fully confined 3D microfluidic chambers were produced by lithography. They were lipid-bilayer coated and connected through valves with a protein reservoir. After protein injection, the valves are closed.                                                                                                    | 2.4 $\mu\text{m}$ x 10-60 $\mu\text{m}$ x 10-90 $\mu\text{m}$ (height x width x length)                                                                                                | Caspi and Dekker, 2016                                     |

**Table S2. Quantitative information on the parameter-influence on the Min protein dynamics gained through reconstituted systems.**

Only one dataset is given per parameter; for further information see references in Fig. 2. For further details on the confinement methods, see Table S1. \**E. coli* lipid extract includes the lipids PG, PC, CL. \*\* Higher diffusivity on the membrane was achieved through GUVs, who form a more fluid membrane (than SLBs). \*\*\*Lower cytosolic diffusivity was achieved through the use of a crowding agent: Ficoll70 (140 g/l). Abbreviations: CL: cardiolipin, GUV: free-standing giant uni-lamellar vesicle, MTS: Membrane-targeting sequence, ΔMTS: MinE lacking the entire MTS, PC: 1,2-dioleoyl-sn-glycero-3-phosphocholine, PG: 1,2-diacyldoyl-sn-glycero-3-phospho-(1'-rac-glycerol), RT: room temperature, SLB: supported lipid bilayer, WT: Wildtype.

| Parameter                   | Confinement           | Pattern Wavelength [μm] | Wave velocity [μm/s] | Diffusion coefficient of MinD [μm <sup>2</sup> /s] | Min D conc. [μM] | MinE conc. [μM] | Temp. | Change of protein diffusivity | Membrane composition          | Reference              |
|-----------------------------|-----------------------|-------------------------|----------------------|----------------------------------------------------|------------------|-----------------|-------|-------------------------------|-------------------------------|------------------------|
| Confinement and Temperature | 2D free standing SLBs | 78±12                   | 0.6±0.2              | -                                                  | 1.1              | 1.0             | RT    | -                             | PC:PG (67:33)                 | Caspi and Dekker, 2016 |
|                             |                       | 48±6                    | 1.4                  | -                                                  | 1.1              | 1.0             | 37 °C | -                             | PC:PG (67:33)                 | Caspi and Dekker, 2016 |
|                             | 3D full confinement   | 43±6                    | 0.4±0.1              | -                                                  | 1.1              | 1.0             | RT    | -                             | PC:PG (67:33)                 | Caspi and Dekker, 2016 |
|                             |                       | 37±9                    | 0.5±0.1              | -                                                  | 1.1              | 1.0             | 37 °C | -                             | <i>E. coli</i> lipid extract  | Caspi and Dekker, 2016 |
| MinD to MinE ratio          | 2D free standing SLBs | 100                     | 0.28                 | -                                                  | 1.0              | 0.5             | RT    | -                             | <i>E. coli</i> lipid extract* | Loose et al., 2008     |
|                             | 2D free standing SLBs | 55                      | 0.80                 | -                                                  | 1.0              | 5.0             | RT    | -                             | <i>E. coli</i> lipid extract* | Loose et al., 2008     |

|                                    |                        |            |            |           |      |            |    |                                 |                               |                           |
|------------------------------------|------------------------|------------|------------|-----------|------|------------|----|---------------------------------|-------------------------------|---------------------------|
| MinE MTS                           | 2D free standing SLBs  | 30±5       | 0.65±0.05  | -         | 1.0  | 5.0 (WT)   | RT | -                               | <i>E. coli</i> lipid extract* | Kretschmer et al., 2017   |
|                                    | 2D free standing SLBs  | 10±2       | 0.65±0.10  | -         | 1.0  | 5.0 (ΔMTS) | RT | -                               | <i>E. coli</i> lipid extract* | Kretschmer et al., 2017   |
| Membrane Diffusivity               | 2D free standing SLBs  | 65 to 110  | 0.4 to 1.0 | 0.25±0.04 | 0.75 | 0.75       | RT | -                               | <i>E. coli</i> lipid extract* | Martos et al., 2013       |
|                                    | GUV (2D surface)       | 120 to 420 | 1.1 to 3.7 | 1.0±0.2   | 0.75 | 0.75       | RT | Higher membrane diffusivity **  | <i>E. coli</i> lipid extract* | Martos et al., 2013       |
| Diffusivity in the cytosol         | 2D free standing SLBs  | 70         | 0.75       | -         | 0.75 | 0.75       | RT | -                               | <i>E. coli</i> lipid extract* | Martos et al., 2015       |
|                                    | 2D free standing SLBs  | 20         | 0.2        | -         | 0.75 | 0.75       | RT | Lower cytosolic diffusivity *** | <i>E. coli</i> lipid extract* | Martos et al., 2015       |
| Membrane composition: Effect of CL | Flowcell with SLB (2D) | 24         | 15±2       | -         | 1.0  | 5.0        | RT | -                               | <i>E. coli</i> lipid extract* | Vecchiarelli et al., 2014 |
|                                    | Flowcell with SLB (2D) | 20         | 22±3       | -         | 1.0  | 5.0        | RT | -                               | PC:PG (67:33)                 | Vecchiarelli et al., 2014 |

**Table S3. Examples on how quantitative information obtained by *in vitro* experiments on MTs led to deeper understanding of the underlying biological processes.**

| <b><i>In vitro</i> technique</b>                                                                                                                             | <b>Measured parameter</b>                                                                                                              | <b>Implication</b>                                                                                                                           | <b>Reference</b>           |
|--------------------------------------------------------------------------------------------------------------------------------------------------------------|----------------------------------------------------------------------------------------------------------------------------------------|----------------------------------------------------------------------------------------------------------------------------------------------|----------------------------|
| Optical trapping of beads coated with single kinesin molecules that can walk along MTs                                                                       | Step size of 8 nm when kinesin moves along the MT                                                                                      | Answer to the question if motors make characteristic steps                                                                                   | Svoboda et al., 1993       |
| Single molecule fluorescence using total internal reflection (TIRF) microscopy and photobleaching experiments on single dynein motors combined with axonemes | Mean velocity ( $85 \pm 30$ nm/s), mean run length ( $1.9 \pm 0.2$ $\mu$ m), and 8 nm steps with a 0.8 probability of forward stepping | Molecular model for how processive motion is achieved by cytoplasmic dynein                                                                  | Reck-Peterson et al., 2006 |
| TIRF microscopy imaging of single MTs with purified fluorescent fission yeast MAPs                                                                           | Mean velocities and dwell times of the different MAPs                                                                                  | Mechanistic understanding of MT plus-end tracking by Mal3 and the Tea2-Tip1-Mal3 complex in fission yeast                                    | Bieling et al., 2007       |
| TIRF imaging of single MTs with purified XMAP215 and EB1, titration of protein concentrations                                                                | MT growth rates and catastrophe frequencies                                                                                            | MT growth rates are increased to physiological ( <i>in vivo</i> ) levels by the synergistic effect of XMAP215 and EB1                        | Zanic et al., 2013         |
| Optical trapping of beads attached to single MTs growing into a barrier coated with dynein                                                                   | Pulling forces up to 5 pN, pulling by cortical dynein leads to centering of a MT aster in a 2D chamber                                 | Demonstrate the intrinsic ability of cortical MT-dynein interactions to regulate MT dynamics and drive positioning processes in living cells | Laan et al., 2012          |

**Table S4. Examples of quantitative measurements necessary for modelling and experimentally building a minimal system for pattern formation by regulation of Cdc42, as is proposed in the discussion session of this paper**

This list serves as an example, rather than being a complete list.

| Protein | Parameter                                                                            | Value                     | Technique                                                                  | Reference                                     |
|---------|--------------------------------------------------------------------------------------|---------------------------|----------------------------------------------------------------------------|-----------------------------------------------|
| Cdc42   | Protein abundance/cell                                                               | 8690/cell                 | Proteomics                                                                 | Kulak et al., 2014                            |
| Cdc42   | nucleotide exchange rate                                                             | 0.0002/s                  | <i>in vitro</i> Biochemistry                                               | Zheng et al., 1994                            |
| Cdc42   | GEF induced cellular nucleotide exchange rate                                        | 63.1/s                    | Model fitting                                                              | Freisinger et al., 2013                       |
| Cdc42   | GAP induced cellular hydrolysis rate                                                 | 2.74/s                    | Model fitting                                                              | Freisinger et al., 2013                       |
| Cdc42   | Residence time of protein on the polarity site.                                      | 13.6 ± 1.5 (s.e.m.) s     | Fluorescent recovery after photobleaching (FRAP) experiments in live cells | Gao et al., 2011                              |
| Rdi1    | Protein abundance/cell                                                               | 1670; 12395 proteins/cell | Proteomics                                                                 | Ghaemmaghami et al., 2003; Kulak et al., 2014 |
| Rdi1    | Dissociation constant for the interaction between Cdc42-GDP and Rdi1 on the membrane | 180 nM                    | <i>In vitro</i> biochemistry                                               | Johnson et al., 2009                          |
| Rdi1    | Dissociation constant for the interaction between Cdc42-GTP and Rdi1 on the membrane | 1400 nM                   | <i>In vitro</i> biochemistry                                               | Johnson et al., 2009                          |
| Rdi1    | Association rate of Cdc42-GDP-Rdi1 to the membrane                                   | 0.03/s                    | <i>In vitro</i> biochemistry                                               | Johnson et al., 2009                          |

|            |                                                     |                                          |                                |                                               |
|------------|-----------------------------------------------------|------------------------------------------|--------------------------------|-----------------------------------------------|
| Rdi1       | Dissociation rate of Cdc42-GDP-Rdi1 to the membrane | 0.14/s                                   | <i>In vitro</i> biochemistry   | Johnson et al., 2009                          |
| Rdi1       | Association rate of Cdc42-GTP-Rdi1 to the membrane  | 0.02/s                                   | <i>In vitro</i> biochemistry   | Johnson et al., 2009                          |
| Rdi1       | Dissociation rate of Cdc42-GTP-Rdi1 to the membrane | 0.13/s                                   | <i>In vitro</i> biochemistry   | Johnson et al., 2009                          |
| Bem1       | Protein abundance per cell                          | 1037; 6490 proteins/cell                 | Proteomics                     | Ghaemmaghami et al., 2003; Kulak et al., 2014 |
| Bem1       | Protein residence time on the polarity site.        | 10.2±1.6 (s.e.m.) s                      | FRAP experiments in live cells | Gao et al., 2011                              |
| Bem1–Cdc24 | Cdc24 induced GDP exchange rate of Cdc42            | [Bem1] dependent: 0.0024/s for 5 µM Bem1 | <i>In vitro</i> biochemistry   | Rapali et al., 2017                           |
| Cdc24      | Protein abundance per cell                          | 1010; 934 proteins/cell                  | Proteomics                     | Ghaemmaghami et al., 2003; Kulak et al., 2014 |
| Cdc24      | Protein residence time on the polarity site.        | 15.0±1.9 (s.e.m.) s                      | FRAP experiments in live cells | Gao et al., 2011                              |
| Cdc24      | Cdc24 induced GDP exchange rate of Cdc42            | 0.0011/s                                 | <i>In vitro</i> biochemistry   | Rapali et al., 2017                           |
| Bem3       | Protein abundance per cell                          | 852; 599 proteins/cell                   | Proteomics                     | Ghaemmaghami et al., 2003; Kulak et al., 2014 |
| Bem3       | Protein residence time on the polarity site.        | 19.0±1.7 (s.e.m.) s                      | FRAP experiments in live cells | Gao et al., 2011                              |
| Bem3       | GTPase activity for human Cdc42                     | 100 nM                                   | <i>In vitro</i> biochemistry   | Zheng et al., 1993                            |
